# Supplementary material
Source: JCI journal article supplement (doi:10.1172/jci175704)
Supplement: sd1 [file 1]

| Genotype                    | Average myeloid:erythroid ratio | Average megakaryocyte # / section |
|-----------------------------|---------------------------------|-----------------------------------|
| <i>Lman1</i> <sup>+/+</sup> | 1.79                            | 338.0                             |
| <i>Lman1</i> <sup>-/-</sup> | 1.77                            | 310.3                             |

Table S1. Number of megakaryocytes in *Lman1*<sup>-/-</sup> and wildtype littermate bone marrows by histologic evaluation.

| Primer                 | 5' → 3' Sequence           |
|------------------------|----------------------------|
| <b>qRT-PCR primers</b> |                            |
| <i>Gapdh</i> Fwd       | TGTGTCCGTCGTGGATCTGA       |
| <i>Gapdh</i> Rev       | ACCACCTTCTTGATGTCATCATACTT |
| <i>Actin</i> Fwd       | CTAAGGCCAACCGTGAAAAG       |
| <i>Actin</i> Rev       | GGGGTGTTGAAGGTCTCAA        |
| mTPO1 Fwd              | GACTCCCACCTCCTTCACAG       |
| mTPO1 Rev              | TCCCAGGCTAAAGTCCACAG       |
| mTPO2 Fwd              | CCTGGGAGAATGGAAAACCC       |
| mTPO2 Rev              | CTGTCCTCGTGCTGCCA          |
| mTPO3 Fwd              | ACAGCTTTCTGGGCAGGTT        |
| mTPO3 Rev              | GGTCCTTGTGAGCTGTGGTC       |

Table S2. Primer sequences for qRT-PCR.

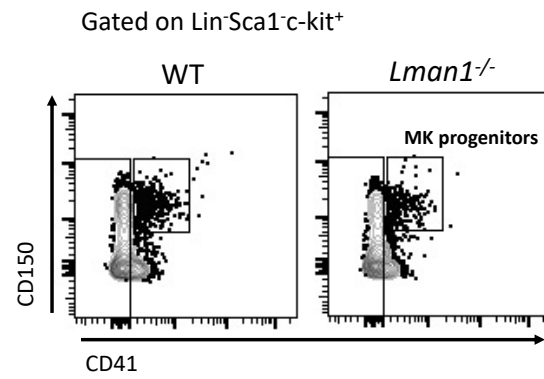

**Figure S1. Gating strategy for MK progenitors.**

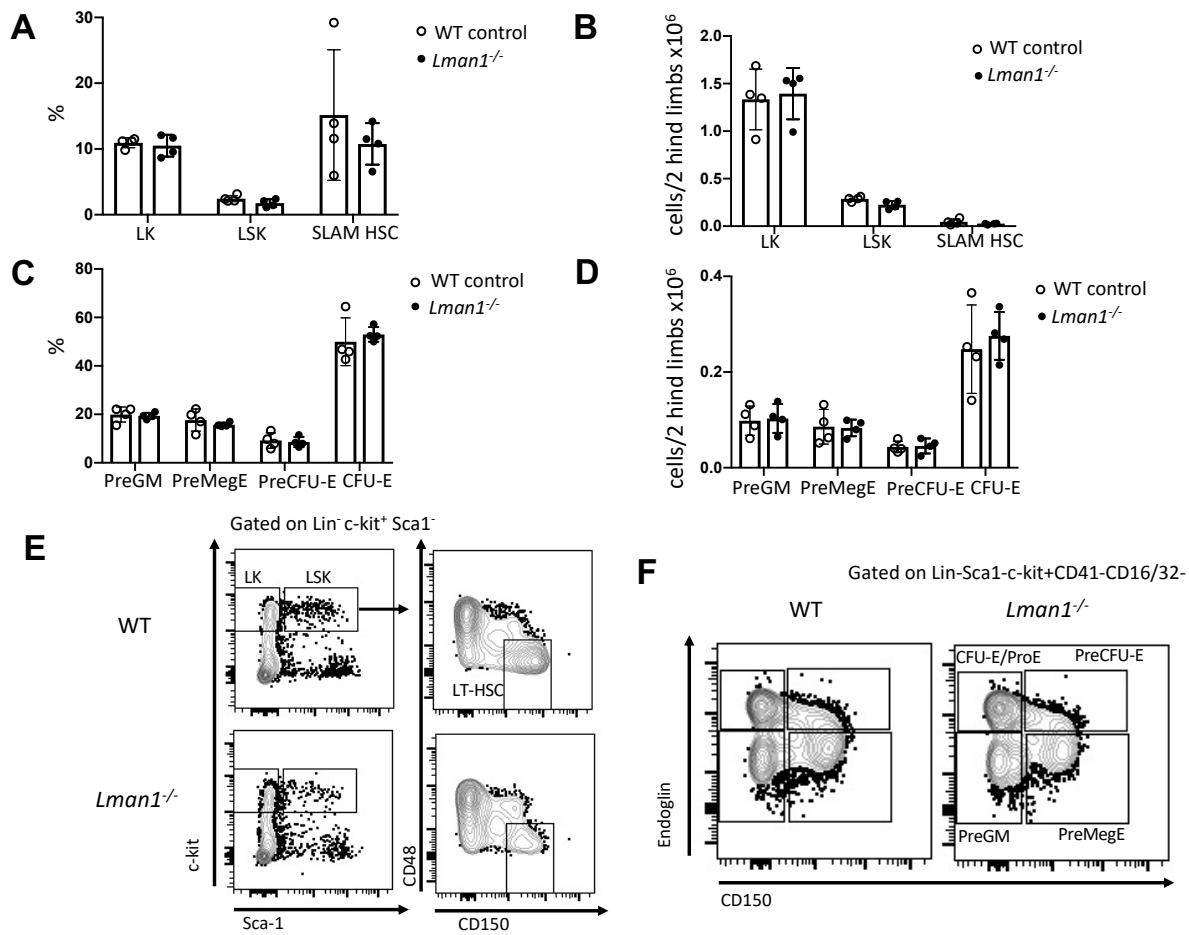

**Figure S2. Hematopoietic stem and progenitor cells in *Lman1*<sup>-/-</sup> and wildtype control mice.** LMAN1 deficient mice exhibit normal (A) percentages and (B) numbers of SLAM hematopoietic stem cells (Lin<sup>-</sup>Sca1<sup>-</sup>c-KIT<sup>+</sup>CD150<sup>+</sup>CD48<sup>+</sup>), LK (Lin<sup>-</sup>Sca1<sup>-</sup>c-KIT<sup>+</sup>), and LSK (Lin<sup>-</sup>Sca1<sup>-</sup>c-KIT<sup>+</sup>) progenitors, as well as normal (C) percentages and (D) numbers of PreGM (Lin<sup>-</sup>c-KIT<sup>+</sup>Sca1<sup>-</sup>CD41<sup>-</sup>CD16/32<sup>-</sup>CD150<sup>-</sup>CD105<sup>-</sup>), PreMegE (Lin<sup>-</sup>c-KIT<sup>+</sup>Sca1<sup>-</sup>CD41<sup>-</sup>CD16/32<sup>-</sup>CD150<sup>+</sup>CD105<sup>-</sup>), PreCFU-E (Lin<sup>-</sup>c-KIT<sup>+</sup>Sca1<sup>-</sup>CD41<sup>-</sup>CD16/32<sup>-</sup>CD150<sup>+</sup>CD105<sup>+</sup>), and CFU-E (Lin<sup>-</sup>c-KIT<sup>+</sup>Sca1<sup>-</sup>CD41<sup>-</sup>CD16/32<sup>-</sup>CD150<sup>-</sup>CD105<sup>+</sup>) progenitors. (E, F) Illustration of the gating strategy for LK, LSK, SLAM HSC, preGM, preMegE, preCFU-E, and CFU-E populations.

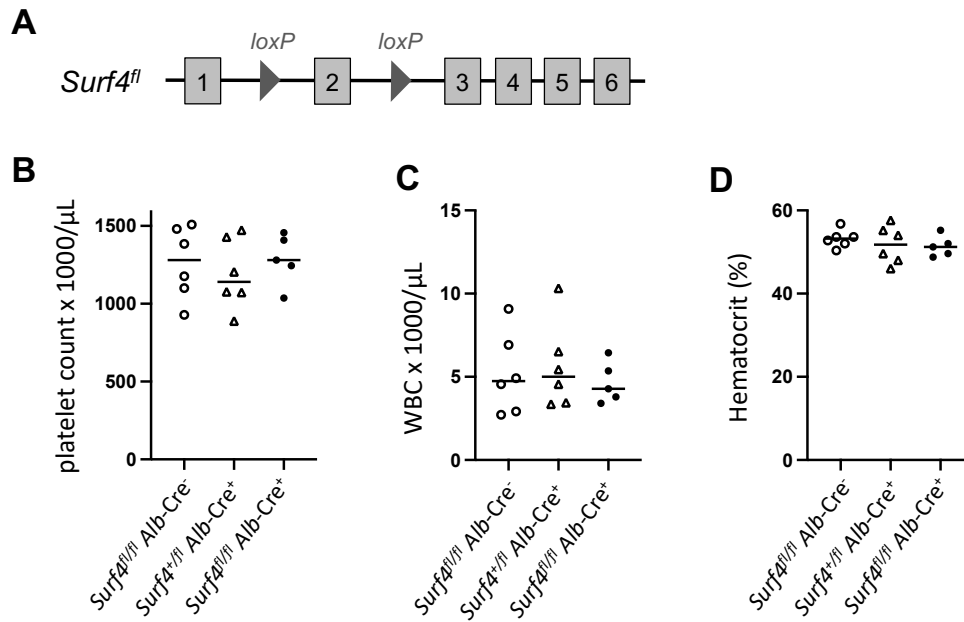

**Figure S3. Deletion of *Surf4* in hepatocytes does not result in thrombocytopenia.** (A) Mice with hepatocyte-specific *Surf4* deletion were generated. These mice did not exhibit (B) thrombocytopenia compared to littermate controls. *Surf4<sup>fl/fl</sup> Alb-Cre<sup>+</sup>* mice exhibit (C) white blood cell counts and (D) hematocrit levels indistinguishable from wildtype littermate controls.

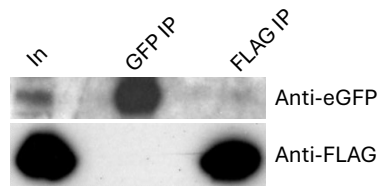

**Figure S4. MCFD2 and TPO do not interact by co-immunoprecipitation.** FLAG-tagged MCFD2 was expressed in HEK293T cells expressing eGFP-tagged TPO. A physical interaction between TPO and MCFD2 was not apparent, as an anti-FLAG antibody did not immunoprecipitate TPO-eGFP and an anti-eGFP antibody did not immunoprecipitate MCFD2-FLAG. IP, immunoprecipitated fraction. In, input (10%).

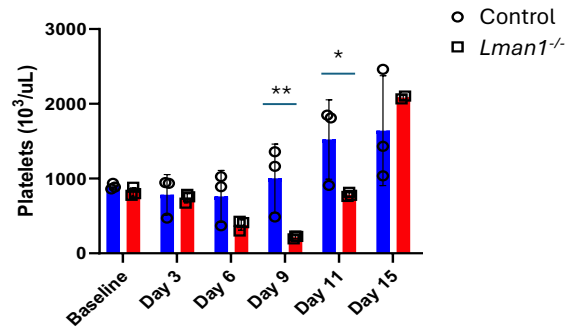

**Figure S5. *Lman1* null mice exhibit delayed platelet recovery under hematopoietic stress.** Platelet counts of *Lman1*<sup>-/-</sup> and wildtype littermate control mice measured on days 3, 6, 9, 11, and 15 following administration of 5-FU. \*\*p<0.01; \*p<0.05. Data was analyzed using unpaired Student's t-test.
